# Supplementary material
Source: HighWire-hosted journal article supplement (https://erj.ersjournals.com/content/56/1/2001589)
Supplement: inline-supplementary-material-1 [file inline-supplementary-material-1.pdf]

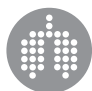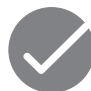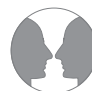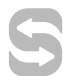

SHAREABLE PDF

# COVID-19 and the nicotinic cholinergic system

Konstantinos Farsalinos , Athina Angelopoulou , Nikos Alexandris and Konstantinos Poulas

**Affiliation:** Laboratory of Molecular Biology and Immunology, Dept of Pharmacy, University of Patras, Patras, Greece.

**Correspondence:** Konstantinos Farsalinos, Leoforos Alexandras 196A, Athens 11521, Greece.  
E-mail: kfarsalinos@gmail.com

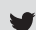

@ERSpublications

The prevalence of smoking among hospitalised COVID-19 patients is low. COVID-19 manifestations could be linked to impairment of the cholinergic anti-inflammatory pathway. Nicotinic cholinergic agonists should be examined as potential therapeutic options. <https://bit.ly/2zfUZ1S>

**Cite this article as:** Farsalinos K, Angelopoulou A, Alexandris N, *et al.* COVID-19 and the nicotinic cholinergic system. *Eur Respir J* 2020; 56: 2001589 [<https://doi.org/10.1183/13993003.01589-2020>].

This single-page version can be shared freely online.

*To the Editor:*

We have read with great interest the paper by LEUNG *et al.* [1] published in the *European Respiratory Journal*, the correspondence by RUSSO *et al.* [2], and also the subsequent comment by the first group [3]. Both research teams are reporting increased angiotensin-converting enzyme 2 (ACE-2) expression in airways of current smokers and those with COPD, with important implications for coronavirus disease 2019 (COVID-19) patients. Since ACE-2 has been shown to be the main receptor utilised by severe acute respiratory syndrome coronavirus 2 (SARS-CoV-2) to enter the host cells [2], the authors conclude that nicotine is a risk factor for COVID-19. RUSSO *et al.* [2] have shown that nicotine upregulates ACE-2 through  $\alpha 7$ -nAChRs which are present in neuronal and non-neuronal cells. LEUNG *et al.* [3] provided further evidence in support of this hypothesis and propose the repurposing of  $\alpha 7$ -nAChR antagonists for the pandemic (*e.g.* methyllycaconitine,  $\alpha$ -conotoxin), expecting that such treatment will alter ACE-2 expression and prevent SARS-CoV-2 entry.
